# Supplementary material for: Enhancing Outpatient Service Performance through E-Health Capability and Service Quality Using PLS-SEM in Primary Healthcare Centers
Source: Research Square preprint supplement (doi:10.21203/rs.3.rs-8321713/v1), 2025-12-17
Supplement: Supplementary file 1 [file b98bdd023afd1e9c97cd8789.docx]

**QUESTIONNAIRE**

Respectfully,

My name is Yanti Nurhayati, a student of the Doctoral Program in Management Science, Faculty of Business Economics, University of Jember, who will research “Linking Digital Capability to Service Performance in Public Health Centres: The Mediating Role of Service Quality and the Influence of Waiting Time”. Please help you fill out the questionnaire below honestly. The information collected from this questionnaire is confidential and will be used solely for research purposes. For your willingness, thank you.

Charging instructions:

1. This questionnaire aims to assess your experience with e-health-based outpatient services at health centres.
2. All your answers will be kept confidential and will only be used for research purposes.
3. Choose the answer that best suits your experience. Please mark (✓) the option that best suits your opinion.

The rating scale is as follows:

| 1 | : | Strongly Disagree (STS) |
| --- | --- | --- |
| 2 | : | Disagree (TS) |
| 3 | : | Disagree (KS) |
| 4 | : | Agree (S) |
| 5 | : | Strongly Agree (SS) |

1. **RESPONDENT IDENTITIES**

| No | Question | | | Answer (√) |
| --- | --- | --- | --- | --- |
| 1 | Gender | 1 | Man |  |
| 2 | Woman |  |
| 2 | Age | 1 | 17-25 years old |  |
| 2 | 26-35 years old |  |
| 3 | 36-45 years old |  |
| 4 | 46-55 years old |  |
| 5 | > 55 years old |  |
| 3 | Education | 1 | SD |  |
| 2 | SMP |  |
| 3 | SMA |  |
| 4 | SARJANA |  |
| 5 | PASCA SARJANA |  |
| 4 | Work | 1 | ASN/TNI/POLRI |  |
| 2 | Private Employees |  |
| 3 | Self employed |  |
| 4 | Student |  |
| 5 | Pensioner |  |
| 6 | Housewives |  |
| 7 | Not yet/ Not Working |  |
| 5 | Visit | 1 | 1 time |  |
| 2 | 2 times |  |
| 3 | 3 times |  |
| 4 | 4 times |  |
| 5 | 5 times |  |
| 6 | >6 times |  |

## E-HEALTH CAPABILITY (EHC)

| No | Variabel | Answer (√) | | | | |
| --- | --- | --- | --- | --- | --- | --- |
| STS | TS | KS | S | SS |
| 1 | 2 | 3 | 4 | 5 |
| EHC1 | I have an easy-access e-health system before coming to the health centre. |  |  |  |  |  |
| EHC2 | I can use the e-health system without needing the assistance of an officer. |  |  |  |  |  |
| EHC3 | The information on the e-health system is constantly updated and in accordance with the service schedule. |  |  |  |  |  |
| EHC4 | The e-health system provides the information I need.. |  |  |  |  |  |

| No | Variabel | Jawaban (√) | | | | |
| --- | --- | --- | --- | --- | --- | --- |
| STS | TS | KS | S | SS |
| 1 | 2 | 3 | 4 | 5 |
| EHC5 | The information in the e-health system is easy to understand and not confusing. |  |  |  |  |  |
| EHC6 | The e-health system shows the time of my arrival at the public health. |  |  |  |  |  |
| EHC7 | The e-health system automatically and accurately records my data during registration. |  |  |  |  |  |
| EHC8 | The e-health system helps speed up the service process at the health centre. |  |  |  |  |  |
| EHC9 | The e-health system is reliable and rarely disrupted. |  |  |  |  |  |
| EHC10 | The e-health system is safe and keeps data confidential  personally. |  |  |  |  |  |
| EHC11 | Healthcare workers appear to be well-prepared and skilled in utilising the e-health system. |  |  |  |  |  |

1. ***OUTPATIENT SERVICE QUALITY (OSQ)***

| No | Variabel | Answer (√) | | | | |
| --- | --- | --- | --- | --- | --- | --- |
| STS | TS | KS | S | SS |
| 1 | 2 | 3 | 4 | 5 |
| OSQ1 | Officers provide services quickly and responsively to  my needs. |  |  |  |  |  |
| OSQ2 | I received a clear and easy-to-understand explanation from the medical staff. |  |  |  |  |  |
| OSQ3 | The officers treated me with care and concern. |  |  |  |  |  |
| OSQ4 | I get a direction or referral after the examination is complete. |  |  |  |  |  |
| OSQ5 | The waiting room facilities felt clean and comfortable while I waited. |  |  |  |  |  |
| OSQ6 | Information on service schedules and visit flows is clearly available. |  |  |  |  |  |
| OSQ7 | Facilities such as chairs, air conditioning, and information displays are available and function well. |  |  |  |  |  |

| No | Variabel | Jawaban (√) | | | | |
| --- | --- | --- | --- | --- | --- | --- |
| STS | TS | KS | S | SS |
| 1 | 2 | 3 | 4 | 5 |
| OSQ8 | My complaints about the service were handled seriously and quickly. |  |  |  |  |  |
| OSQ9 | Officers provide information and directions in a systematic and structured manner during the service process |  |  |  |  |  |

1. ***WAITING TIME* (WT)**

| No | Variabel | Jawaban (√) | | | | |
| --- | --- | --- | --- | --- | --- | --- |
| STS | TS | KS | S | SS |
| 1 | 2 | 3 | 4 | 5 |
| WT1 | I get medical care without having to wait too long. |  |  |  |  |  |
| WT2 | I feel that the waiting time I experienced is in accordance with the schedule listed in the system. |  |  |  |  |  |
| WT3 | I feel that the waiting time before getting services feels reasonable and not too long. |  |  |  |  |  |
| WT4 | I felt comfortable while waiting for services in the waiting room of the health center. |  |  |  |  |  |

## SERVICE PERFORMANCE (SP)

| No | Variabel | Answer (√) | | | | |
| --- | --- | --- | --- | --- | --- | --- |
| STS | TS | KS | S | SS |
| 1 | 2 | 3 | 4 | 5 |
| SP1 | I feel that the service I received helped speed up the healing process. |  |  |  |  |  |
| SP2 | I feel that health workers provide a clear diagnosis and according to my condition. |  |  |  |  |  |
| SP3 | I believe the medical treatment given is appropriate and according to my needs. |  |  |  |  |  |
| SP4 | I am satisfied with the overall service provided by this public health center. |  |  |  |  |  |

| No | Variabel | Jawaban (√) | | | | |
| --- | --- | --- | --- | --- | --- | --- |
| STS | TS | KS | S | SS |
| 1 | 2 | 3 | 4 | 5 |
| SP5 | This health centre provides quality services. |  |  |  |  |  |
| SP6 | I am willing to return to using the public health centre services  This is if I need health services. |  |  |  |  |  |
| SP7 | I would recommend this health center service to family, friends, or others. |  |  |  |  |  |

Thank You
